# Supplementary material for: Fe9S10-decorated N, S co-doped graphene as a new and efficient electrocatalyst for oxygen reduction and oxygen evolution reactions
Source: Royal Society of Chemistry journal article supplement (doi:10.1039/c6cy02215d), 2017-01-01
Supplement: c6cy02215d1.pdf [file c6cy02215d1.pdf]

# Supporting Information

**Fe<sub>9</sub>S<sub>10</sub>-decorated N, S co-doped graphene as a new and efficient electrocatalyst for oxygen reduction and oxygen evolution reactions**

**Xiu-Xiu Ma<sup>a</sup>, Yan Su<sup>a</sup>, Xing-Quan He<sup>a\*1</sup>**

*<sup>a</sup>School of Materials Science and Engineering, Changchun University of Science and Technology, Jinlin, 130022, RP, China.*

---

<sup>1</sup>\*Corresponding author: [hexingquan@hotmail.com](mailto:hexingquan@hotmail.com)

Tel:+86 431 85583430

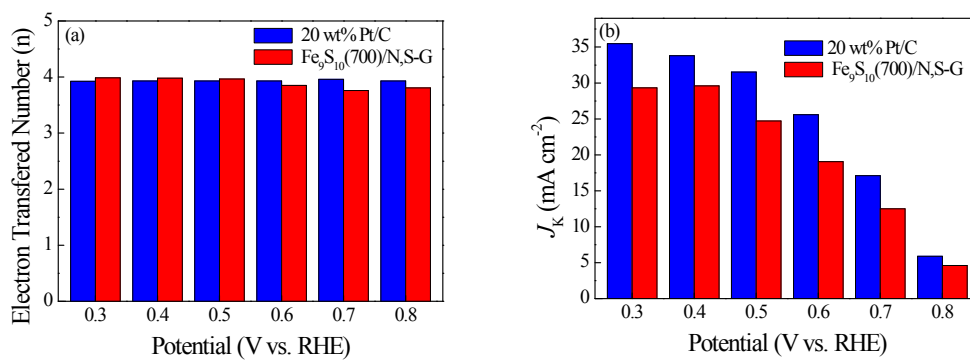

**Figure S1.** (a) Electron transferred number and (b) kinetic current density for 20 wt% Pt/C and Fe<sub>9</sub>S<sub>10</sub>(700)/N,S-G in the tested kinetic potentials (0.3–0.8 V vs. RHE).

**Table S1** The ORR parameters of the electrodecatalyst compared with the state-of-the-art ORR catalysts in literatures

| Catalyst                                    | $E_0$ [V vs. RHE] | $E_{1/2}$ [V vs. RHE] | $J$ [mA cm <sup>-2</sup> ] | Reference |
|---------------------------------------------|-------------------|-----------------------|----------------------------|-----------|
| Fe <sub>9</sub> S <sub>10</sub> (700)/N,S-G | 0.959             | 0.800                 | -5.73                      | This work |
| HNCS71                                      | 0.970             | 0.820                 | -6.50                      | [1]       |
| FePc/C(600)                                 | 0.926             | 0.859                 | -5.60                      | [2]       |
| (FeP) <sub>n</sub> -CNTs                    | 0.880             | 0.760                 | -4.70                      | [3]       |
| Fe/Co-CMP-800                               | 0.880             | 0.760                 | -4.80                      | [4]       |
| Co <sub>x</sub> C/C                         | 0.934             | 0.760                 | -4.20                      | [5]       |
| Fe-N <sub>x</sub> /HPC                      | 0.935             | 0.880                 | -5.00                      | [6]       |
| CoP-CMP800                                  | 0.830             | 0.870                 | -4.62                      | [7]       |
| Fe-N-C/VA-CNT                               | 0.970             | 0.790                 | -6.00                      | [8]       |
| FeCo-NC                                     | 1.050             | 0.840                 | -5.00                      | [9]       |
| Fe-N-C/850                                  | 0.960             | 0.600                 | -4.20                      | [10]      |
| Fe/Fe <sub>3</sub> C@N-C-NaCl               | 0.970             | 0.869                 | -5.00                      | [11]      |
| Fe-N-C                                      | 1.040             | 0.880                 | -5.60                      | [12]      |
| Fe-CNT-PA                                   | 0.925             | 0.795                 | -6.82                      | [13]      |
| Fe-N-C                                      | 0.990             | 0.784                 | -6.50                      | [14]      |
| P-CNCo-20                                   | 0.925             | 0.845                 | -6.00                      | [15]      |

**Table S2** The OER parameters of the electrodecatalyst compared with the state-of-the-art ORR catalysts in literatures

| Catalysts                                                           | $\eta_{10}$ [mV] | Tafel slope [mV dec <sup>-1</sup> ] | Reference |
|---------------------------------------------------------------------|------------------|-------------------------------------|-----------|
| Fe <sub>9</sub> S <sub>10</sub> (700)/N,S-G                         | 400              | 71                                  | This work |
| N-MGF                                                               | 402              | 67                                  | [16]      |
| FeP@NPCs                                                            | 300              | 80                                  | [17]      |
| Co <sub>2</sub> P@N,P-PCN/CNTs                                      | 300              | 72                                  | [18]      |
| NiFeO@MnO <sub>x</sub>                                              | 400              | 42                                  | [19]      |
| N-Co <sub>9</sub> S <sub>8</sub> /G                                 | 409              | 82.7                                | [20]      |
| CoMnO@CN                                                            | 290              | 97                                  | [21]      |
| N,P-GCNS                                                            | 340              | -                                   | [22]      |
| Co <sub>x</sub> S <sub>y</sub> @C-1000                              | 470              | -                                   | [23]      |
| Fe <sub>3</sub> O <sub>4</sub> @Co <sub>9</sub> S <sub>8</sub> /rGO | 320              | 65.5                                | [24]      |
| Co <sub>9</sub> S <sub>8</sub> @MoS <sub>2</sub> /CNFs              | 430              | 61                                  | [25]      |
| echo-MWCNTs                                                         | 360              | 41                                  | [26]      |

### Notes and references

- [1] J. Sanetuntikula, C. Chuaichamb, Y. W. Choic and S. Shanmugam, *J. Mater. Chem. A*, 2015, DOI: 10.1039/C5TA02677F.
- [2] H. A. Miller, M. Bellini, W. Oberhauser, X. Deng, H. Q. Chen, Q. G. He, M. Passaponti, M. Innocenti, R. Yang, F. F. Sun, Z. Jiang and F. Vizza, *Phys. Chem. Chem. Phys.*, 2016, DOI: 10.1039/C6CP06798K.
- [3] H. X. Jia, Z. J. Sun, D. C. Jiang, S. F. Yang and P. W. Du, *Inorg. Chem. Front.*,

2016, **3**, 821–827.

[4] S. Brüller, H. W. Liang, U. I. Kramm, J. W. Krumpfer, X. L. Feng and K. Müllen, *J. Mater. Chem. A*, 2015, **3**, 23799–23808.

[5] L. S. Chen, X. Z. Cui, Q. S. Wang, X. H. Zhang, G. Wan, F. M. Cui, C. Y. Wei and J. L. Shi, *Dalton Transactions*, 2015, DOI: 10.1039/C5DT03337C.

[6] Z. P. Zhang, X. J. Gao, M. L. Dou, J. Ji and F. Wang, *J. Mater. Chem. A*, 2016, DOI: 10.1039/c6ta09124e.

[7] Z. S. Wu, L. Chen, J. Z. Liu, K. Parvez, H. W. Liang, J. Shu, H. Sachdev, R. Graf, X. L. Feng and K. Müllen, *Adv. Mater.*, 2014, **26**, 1450–1455.

[8] S. Yasuda, A. Furuya, Y. Uchibori, J. Kim and K. Murakoshi, *Adv. Funct. Mater.*, 2016, **26**, 738–744.

[9] Z. P. Zhang, M. L. Dou, H. J. Liu, L. M. Dai and F. Wang, *Small*, 2016, **12**, 4193–4199.

[10] A. H. A. M. Videla, L. Osmieri, M. Armandi and S. Specchia, *Electrochimica Acta*, 2015, **177**, 43–50.

[11] Y. Z. Chen, C. M. Wang, Z. Y. Wu, Y. J. Xiong, Q. Xu, S. H. Yu and H. L. Jiang, *Adv. Mater.*, 2015, **27**, 5010–5016.

[12] W. Luo, T. Liu, P. P. Zhao, X. Hua, S. L. Chen and G. Z. Cheng, *J. Mater. Chem. A*, 2016, DOI: 10.1039/C6TA03265F.

[13] G. Yang, W. Choi, X. Pub and C. Yu, *Energy Environ. Sci.*, 2015, **8**, 1799–1807.

[14] J. K. Li, S. Ghoshal, W. T. Liang, M. T. Sougrati, F. Jaouen, B. Halevi, S. McKinney, G. McCool, C. R. Ma, X. X. Yuan, Z. F. Ma, S. Mukerjee and Q. Y. Jia,

- Energy Environ. Sci.*, 2016, DOI: 10.1039/C6EE01160H.
- [15] Y. Zhang, L. B. Huang, W. J. Jiang, X. Zhang, Y. Y. Chen, Z. D. Wei, L. J. Wan and J. S. Hu, *J. Mater. Chem. A*, 2016, **4**, 7781–7787.
- [16] C. L. Zhang, B. W. Wang, X. C. Shen, J. W. Liu, X. K. Kong, S. S. C. Chuang, D. Yang, A. G. Dong and Z. M. Peng, *Nano Energy*, 2016, **30**, 503–510.
- [17] R. Z. Zhang, C. M. Zhang and W. Chen, *J. Mater. Chem. A*, 2016, DOI: 10.1039/C6TA08363C.
- [18] X. Z. Li, Y. Y. Fang, F. Li, M. Tian, X. F. Long, J. Jin and J. T. Ma, *J. Mater. Chem. A*, 2016, **4**, 15501–15510.
- [19] Y. Cheng, S. Dou, M. Saunders, J. Zhang, J. Pan, S. Y. Wang and S. P. Jiang, *J. Mater. Chem. A*, 2016, **4**, 13881–13889.
- [20] S. Dou, L. Tao, J. Huo, S. Y. Wang and L. M. Dai, *Energy Environ. Sci.*, 2016, **9**, 1320–1326.
- [21] J. Li, Y. C. Wang, T. Zhou, H. Zhang, X. H. Sun, J. Tang, L. J. Zhang, A. M. Al-Enizi, Z. Q. Yang and G. F. Zheng, *J. Am. Chem. Soc.*, 2015, **137**, 14305–14312.
- [22] R. Li, Z. D. Wei and X. L. Gou, *ACS Catal.*, 2015, **5**, 4133–4142.
- [23] B. L. Chen, R. Li, G. P. Ma, X. L. Gou, Y. Q. Zhu and Y. D. Xia, *Nanoscale*, 2015, **7**, 20674–20684.
- [24] J. Yang, G. X. Zhu, Y. J. Liu, J. X. Xia, Z. Y. Ji, X. P. Shen and S. K. Wu, *Adv. Funct. Mater.*, 2016, DOI: 10.1002/adfm.201600674.
- [25] H. Zhu, J. F. Zhang, R. P. Yanzhang, M. L. Du, Q. F. Wang, G. H. Gao, J. D. Wu, G. M. Wu, M. Zhang, B. Liu, J. M. Yao and X. W. Zhang, *Adv. Mater.*, 2015, **27**,

4752–4759.

[26] X. Y. Lu, W. L. Yim, B. H. R. Suryanto and C. Zhao, *J. Am. Chem. Soc.*, 2015, **137**, 2901–2907.
